# Supplementary material
Source: PubMed Central journal article supplement (PMC4468666)
Supplement: AAC.05150-14_zac007154103so1.pdf [file AAC.05150-14_zac007154103so1.pdf]

**Table S1. Strains and plasmids used or constructed in this work**

| Strain or Plasmid                                                  | Genotype/relevant characteristics                                                  | Reference or source   |
|--------------------------------------------------------------------|------------------------------------------------------------------------------------|-----------------------|
| <i>P. aeruginosa</i>                                               |                                                                                    |                       |
| PAO1                                                               | Reference strain fully sequenced                                                   | Laboratory collection |
| PAO $\Delta$ <i>ampC</i>                                           | PAO1 $\Delta$ <i>ampC::lox</i>                                                     | (1)                   |
| PAO $\Delta$ <i>dacB</i>                                           | PAO1 $\Delta$ <i>dacB::lox</i>                                                     | (2)                   |
| PAO $\Delta$ <i>dacC</i>                                           | PAO1 $\Delta$ <i>dacC::lox</i>                                                     | This study            |
| PAO $\Delta$ <i>pbpG</i>                                           | PAO1 $\Delta$ <i>pbpG::lox</i>                                                     | This study            |
| PAO $\Delta$ <i>dacB</i> $\Delta$ <i>dacC</i>                      | PAO1 $\Delta$ <i>dacB::lox</i> $\Delta$ <i>dacC::lox</i>                           | This study            |
| PAO $\Delta$ <i>dacB</i> $\Delta$ <i>pbpG</i>                      | PAO1 $\Delta$ <i>dacB::lox</i> $\Delta$ <i>pbpG::lox</i>                           | This study            |
| PAO $\Delta$ <i>dacC</i> $\Delta$ <i>pbpG</i>                      | PAO1 $\Delta$ <i>dacC::lox</i> $\Delta$ <i>pbpG::lox</i>                           | This study            |
| PAO $\Delta$ <i>dacB</i> $\Delta$ <i>dacC</i> $\Delta$ <i>pbpG</i> | PAO1 $\Delta$ <i>dacB::lox</i> $\Delta$ <i>dacC::lox</i> $\Delta$ <i>pbpG::lox</i> | This study            |
| PAO $\Delta$ <i>dacB</i> $\Delta$ <i>ampC</i>                      | PAO1 $\Delta$ <i>dacB::lox</i> $\Delta$ <i>ampC::lox</i>                           | This study            |
| PAO $\Delta$ <i>dacC</i> $\Delta$ <i>ampC</i>                      | PAO1 $\Delta$ <i>dacC::lox</i> $\Delta$ <i>ampC::lox</i>                           | This study            |
| PAO $\Delta$ <i>pbpG</i> $\Delta$ <i>ampC</i>                      | PAO1 $\Delta$ <i>pbpG::lox</i> $\Delta$ <i>ampC::lox</i>                           | This study            |
| PAO $\Delta$ <i>dacB</i> $\Delta$ <i>dacC</i> $\Delta$ <i>ampC</i> | PAO1 $\Delta$ <i>dacB::lox</i> $\Delta$ <i>dacC::lox</i> $\Delta$ <i>ampC::lox</i> | This study            |
| PAO $\Delta$ <i>dacB</i> $\Delta$ <i>pbpG</i> $\Delta$ <i>ampC</i> | PAO1 $\Delta$ <i>dacB::lox</i> $\Delta$ <i>pbpG::lox</i> $\Delta$ <i>ampC::lox</i> | This study            |
| PAO $\Delta$ <i>dacC</i> $\Delta$ <i>pbpG</i> $\Delta$ <i>ampC</i> | PAO1 $\Delta$ <i>dacC::lox</i> $\Delta$ <i>pbpG::lox</i> $\Delta$ <i>ampC::lox</i> | This study            |

|                                                                                                           |                                                                                                                                                                                                              |                                    |
|-----------------------------------------------------------------------------------------------------------|--------------------------------------------------------------------------------------------------------------------------------------------------------------------------------------------------------------|------------------------------------|
| PAO $\Delta$ <i>dacB</i> $\Delta$ <i>pbpG</i> $\Delta$ <i>ampC</i> $\Delta$ <i>dacC</i>                   | PAO1 $\Delta$ <i>dacB::lox</i> $\Delta$ <i>pbpG::lox</i> $\Delta$ <i>ampC::lox</i> $\Delta$ <i>dacC::lox</i>                                                                                                 | This study                         |
| PAO $\Delta$ <i>dacB</i> $\Delta$ <i>dacC</i> $\Delta$ <i>pbpG</i> $\Delta$ <i>ampC</i><br><i>E. coli</i> | PAO1 $\Delta$ <i>dacB::lox</i> $\Delta$ <i>dacC::lox</i> $\Delta$ <i>pbpG::lox</i> $\Delta$ <i>ampC::lox</i>                                                                                                 | This study                         |
| XL1-Blue                                                                                                  | F'::Tn10 <i>proA</i> + <i>proB</i> _+ <i>lacI</i> <sup>q</sup> $\Delta$ ( <i>lacZ</i> )M15/ <i>recA1 endA1 gyrA96</i> (Nal <sup>r</sup> ) <i>thi hsdR17</i> (r <sub>k</sub> + m <sub>k</sub> +) <i>mcrB1</i> | Laboratory collection <sup>b</sup> |
| S17.1 $\lambda$ pyr                                                                                       | <i>recA pro</i> (RP4-2Tet::Mu Kan::Tn7)                                                                                                                                                                      | Laboratory collection <sup>b</sup> |
| Plasmids                                                                                                  |                                                                                                                                                                                                              |                                    |
| pEX100Tlink                                                                                               | Ap <sup>r</sup> <i>sacB</i> , pUC19-based gene replacement vector with an MCS                                                                                                                                | (3)                                |
| pUCGmlox                                                                                                  | Apr Gm <sup>r</sup> , pUC18-based vector containing the lox-flanked <i>aacC1</i> gene                                                                                                                        | (3)                                |
| pCM157                                                                                                    | Tc <sup>r</sup> , <i>cre</i> expression vector                                                                                                                                                               | (3)                                |
| pEXT $\Delta$ <i>ampC</i> ::Gm                                                                            | pEX100Tlink containing 5' and 3' flanking sequence of <i>ampC</i> ::Gm <i>lox</i>                                                                                                                            | (1)                                |
| pEXT $\Delta$ <i>dacB</i> ::Gm                                                                            | pEX100Tlink containing 5' and 3' flanking sequence of <i>dacB</i> ::Gm <i>lox</i>                                                                                                                            | (2)                                |
| pEXT $\Delta$ <i>dacC</i> ::Gm                                                                            | pEX100Tlink containing 5' and 3' flanking sequence of <i>dacC</i> ::Gm <i>lox</i>                                                                                                                            | This study                         |
| pEXT $\Delta$ <i>pbpG</i> ::Gm                                                                            | pEX100Tlink containing 5' and 3' flanking sequence of <i>pbpG</i> ::Gm <i>lox</i>                                                                                                                            | This study                         |

**Table S2: Primers used for PCR amplification of both upstream (PCR1) and downstream (PCR2) regions to PAO1 genes: *pbpG*, *dacC*, *dacB* and *ampC*.**

| Target gene | Primer's Name  | Primer's Sequence, 5'...3' <sup>a</sup>  | PCR Product - bp | Reference  |
|-------------|----------------|------------------------------------------|------------------|------------|
| <i>pbpG</i> | pbpG-F1-ERI    | -TCGAATTC <u>CACTTT</u> CAAAGCCCTACGTGC- |                  | This study |
|             | pbpG-RI- HDIII | -TCAAGCTTGCAGTTTCGAGTCGAGCACG-           | PCR1= 375        |            |
|             | pbpG-F2-HDIII  | -TCAAGCTTCACTGCGATCCCGGCCGC-             |                  |            |
|             | pbpG-R2-BHI    | -TCGGATCCCAGTACCGGACCCAGGAGC-            | PCR2= 318        |            |
| <i>dacC</i> | dacCF-ERI      | -TCGAATTCACCTTGGCCAGCCGACGC-             |                  | This study |
|             | dacCIR-HDIII   | -TCAAGCTTCTCGGCCAGGGCGACGC-              | PCR1= 500        |            |
|             | dacCIF-HDIII   | -TCAAGCTTGAAGTGAAAGCCGGCCTCG-            |                  |            |
|             | dacCR-BHI      | -TCGGATCCACGCTCGCAGGGGAATTTCG-           | PCR2= 400        |            |
| <i>dacB</i> | dacB-F1-ERI    | -TCGAATTC <u>CGACCA</u> TTCGGCGATATGAC-  |                  | (2)        |
|             | dacB-R1-HDIII  | -TCAAGCTTGTGCGCATCAGCAGCCAG-             | PCR1= 571        |            |
|             | dacB-F2-HDIII  | -TCAAGCTT <u>GCCAGGGC</u> AGCGTACCGC-    |                  |            |
|             | dacB-R2-BHI    | -TCGGATCCC <u>CGTAAT</u> CCGAAGATCCATC-  | PCR2= 693        |            |
| <i>ampC</i> | AmpC-F-ERI     | -TCGAATTC <u>CGCGCGC</u> AGGGCGTTCAG-    |                  | (1)        |
|             | AmpC-I-R-HDIII | -TCAAGCTT <u>CGTCCT</u> CTTACGAGGCCAGC-  | PCR1= 415        |            |
|             | AmpC-I-F-HDIII | -TCAAGCTT <u>CAGGGC</u> AGCCGCTTCGAC-    |                  |            |
|             | AmpC-R-BHI     | -TCGGATCCCAGGTTGGCATCGACGAAG-            | PCR2= 448        |            |

<sup>a</sup>In the primer's name; ERI, HDIII and BHI refer to the presence of the restriction sites (underlined sequence), EcoRI, HindIII and BamHI while F and R refer to the direction; forward and reverse respectively.

1. **Moya B, Juan C, Alberti S, Perez JL, Oliver A.** 2008. Benefit of having multiple *ampD* genes for acquiring beta-lactam resistance without losing fitness and virulence in *Pseudomonas aeruginosa*. *Antimicrobial agents and chemotherapy* **52**:3694-3700.
2. **Moya B, Dotsch A, Juan C, Blazquez J, Zamorano L, Haussler S, Oliver A.** 2009. Beta-lactam resistance response triggered by inactivation of a nonessential penicillin-binding protein. *PLoS pathogens* **5**:e1000353.
3. **Quenee L, Lamotte D, Polack B.** 2005. Combined *sacB*-based negative selection and *cre-lox* antibiotic marker recycling for efficient gene deletion in *pseudomonas aeruginosa*. *BioTechniques* **38**:63-67.

**Table S3. Relative abundance and retention time of muropeptides in peptidoglycan of the mutants and PAO1 wild type.**

| Strain                                                             | Muropeptides (mol%) <sup>a</sup> |                  |                     |                  |                   |                   |                  |                 |                 |
|--------------------------------------------------------------------|----------------------------------|------------------|---------------------|------------------|-------------------|-------------------|------------------|-----------------|-----------------|
|                                                                    | M3<br>RT= 5.2                    | M4G<br>RT= 6.4   | M4<br>RT= 9.5       | M5G<br>RT= 10.0  | M5<br>RT= 13.0    | D43<br>RT= 23.0   | D45G<br>RT= 24.6 | D44<br>RT= 25.2 | D45<br>RT= 27.0 |
| PAO1                                                               | 10.5                             | 1.1              | 24.9                | 0.3              | 0.3               | 6.2               | ND               | 26.3            | 0.4             |
| PAO $\Delta$ <i>dacB</i>                                           | 8.5(81)                          | 0.9(82)          | 22.9(94)            | 0.4(133)         | 0.5(167)          | 5.3(85)           | ND               | 28.9(110)       | 0.6(150)        |
| PAO $\Delta$ <i>dacC</i>                                           | 10(95)                           | 0.8(73)          | 25.4(102)           | 0.5(167)         | 1.4(467)          | 5.9(95)           | ND               | 24.6(94)        | 2.8(700)        |
| PAO $\Delta$ <i>pbpG</i>                                           | 8.9(85)                          | 0.9(82)          | 25.2(101)           | ND               | 0.6(200)          | 5.1(82)           | ND               | 29(110)         | 0.2(50)         |
| PAO $\Delta$ <i>dacB</i> $\Delta$ <i>dacC</i>                      | 7.4(71)                          | 0.7(64)          | 17.9(72)            | 1.4(467)         | 7.7(2567)         | 4.3(69)           | 2.5              | 17.3(66)        | 10.1(2525)      |
| PAO $\Delta$ <i>dacB</i> $\Delta$ <i>pbpG</i>                      | 6.7(64)                          | 0.7(64)          | 20.3(82)            | 0.5(167)         | 0.6(200)          | 4.9(79)           | ND               | 31.2(119)       | ND              |
| PAO $\Delta$ <i>dacC</i> $\Delta$ <i>pbpG</i>                      | 8.7(83)                          | 0.8(73)          | 23(92)              | 0.6(200)         | 1.7(567)          | 5.2(84)           | 1                | 25.8(98)        | 4.3(1075)       |
| PAO $\Delta$ <i>dacB</i> $\Delta$ <i>dacC</i> $\Delta$ <i>pbpG</i> | 3.4(32)                          | 0.5(46)          | 6.4(26)             | 3.6(1200)        | 18.6(6200)        | 1.8(29)           | 4.2              | 8.5(32)         | 24.4(6100)      |
| Strain                                                             | Muropeptides (mol%) <sup>a</sup> |                  |                     |                  |                   |                   |                  |                 |                 |
|                                                                    | T444<br>RT= 33.0                 | T445<br>RT= 34.0 | D44N<br>RT= 37.5-38 | D45N<br>RT= 39.3 | T444N<br>RT= 42.5 | T445N<br>RT= 43.2 |                  |                 |                 |
| PAO1                                                               | 2.3                              | ND               | 5                   | 0.1              | 1.7               | 0.3               |                  |                 |                 |
| PAO $\Delta$ <i>dacB</i>                                           | 3.1(134)                         | ND               | 4.7(94)             | 0.1(100)         | 2.2(130)          | 0.3(100)          |                  |                 |                 |
| PAO $\Delta$ <i>dacC</i>                                           | 2.1(91)                          | 0.3              | 4.8(96)             | 0.5(500)         | 1.7(100)          | 0.5(167)          |                  |                 |                 |
| PAO $\Delta$ <i>pbpG</i>                                           | 3(130)                           | ND               | 4.5(90)             | 0.1(100)         | 1.7(100)          | 0.4(121)          |                  |                 |                 |
| PAO $\Delta$ <i>dacB</i> $\Delta$ <i>dacC</i>                      | 1.8(77)                          | 1                | 3.3(66)             | 1.6(1600)        | 1.4(82)           | 1(333)            |                  |                 |                 |
| PAO $\Delta$ <i>dacB</i> $\Delta$ <i>pbpG</i>                      | 4.3(187)                         | ND               | 4.5(90)             | 0.1(100)         | 2.3(135)          | 0.5(167)          |                  |                 |                 |
| PAO $\Delta$ <i>dacC</i> $\Delta$ <i>pbpG</i>                      | 2.8(122)                         | 0.5              | 4.4(88)             | 0.6(600)         | 1.7(100)          | 0.6(200)          |                  |                 |                 |
| PAO $\Delta$ <i>dacB</i> $\Delta$ <i>dacC</i> $\Delta$ <i>pbpG</i> | 1.2(52)                          | 3.3              | 1.1(22)             | 3.2(3200)        | 0.5(29)           | 2(667)            |                  |                 |                 |

<sup>a</sup> Relative abundance in mol % of individual muropeptides. RT: retention time; ND: Not detected. Values in brackets represent percentage of the values obtained for each mutant related to wild-type PAO1.
